# Supplementary material for: The Archaeal Transcription Termination Factor aCPSF1 is a Robust Phylogenetic Marker for Archaeal Taxonomy
Source: PubMed Central journal article supplement (PMC8653824; doi:10.1128/spectrum.01539-21), 2021-12-08
Supplement: spectrum01539-21_supp_1_seq4.pdf [file spectrum01539-21_supp_1_seq4.pdf]

## **Supporting Information for**

### **The archaeal transcription termination factor aCPSF1 is a robust phylogenetic marker for archaeal taxonomy**

#### **This file contains:**

Supplementary Figures. S1 to S4;

Caption for Supplementary Dataset S1 Information of the investigated archaeal genomes downloaded from NCBI database

Caption for Supplementary Dataset S2 Information of the 779 archaeal genomes used for taxonomy ranking based on aCPSF1

Caption for Supplementary Dataset S3 Identified 144 unclassified archaeal genomes in NCBI database based on aCPSF1 taxonomy system

Caption for Supplementary Dataset S4 Sequence similarities of the duplicated aCPSF1 orthologs in 56 out of 366 haloarchaeal genomes



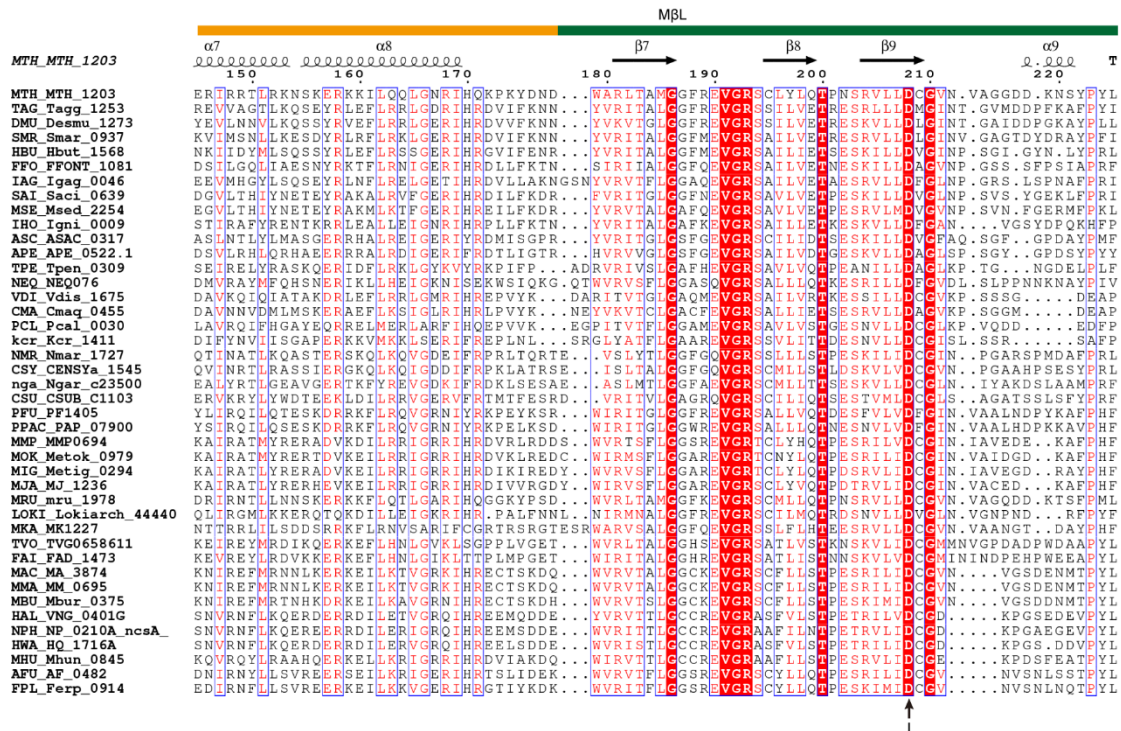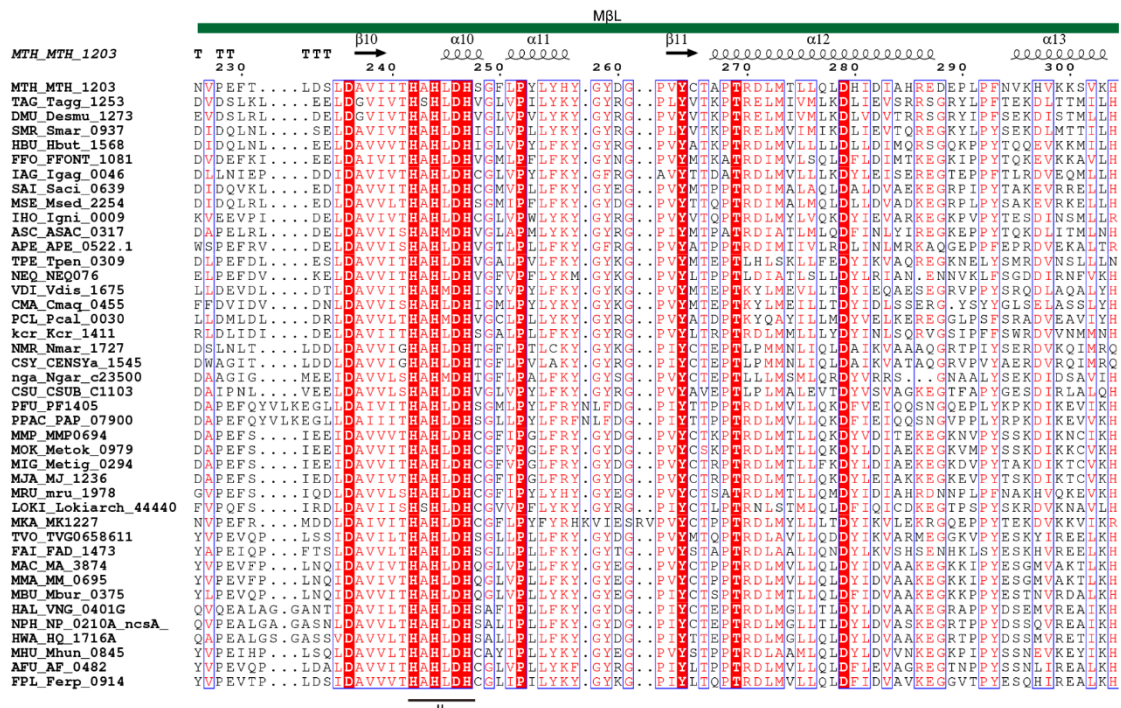

MBL

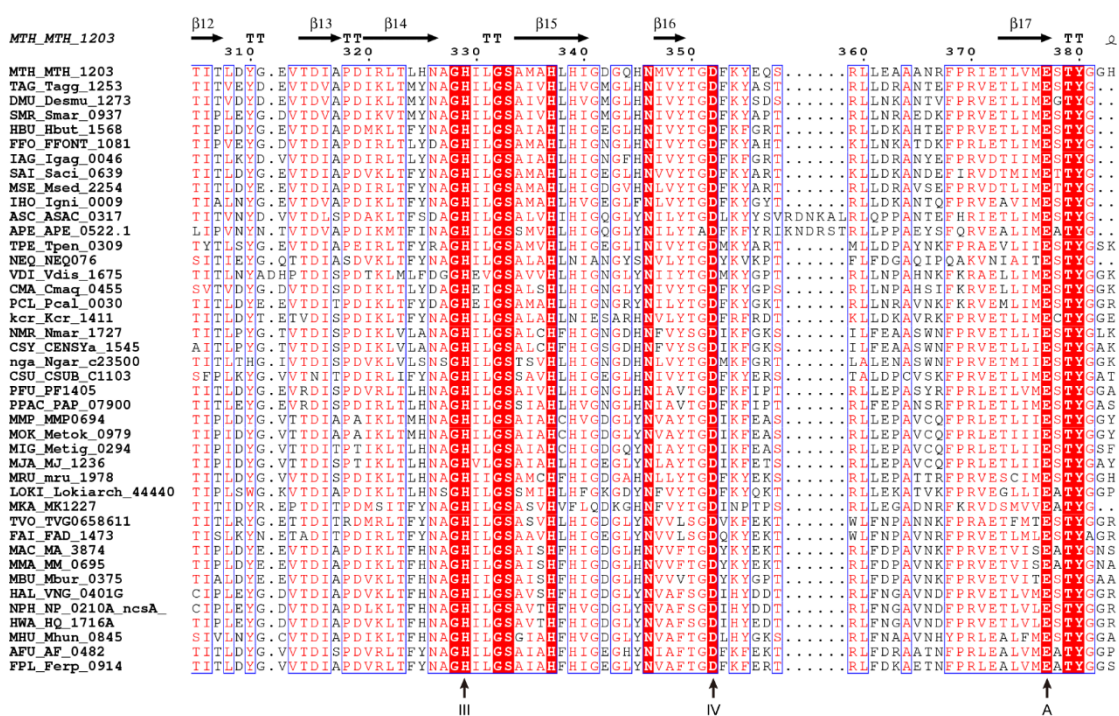

β-CASP

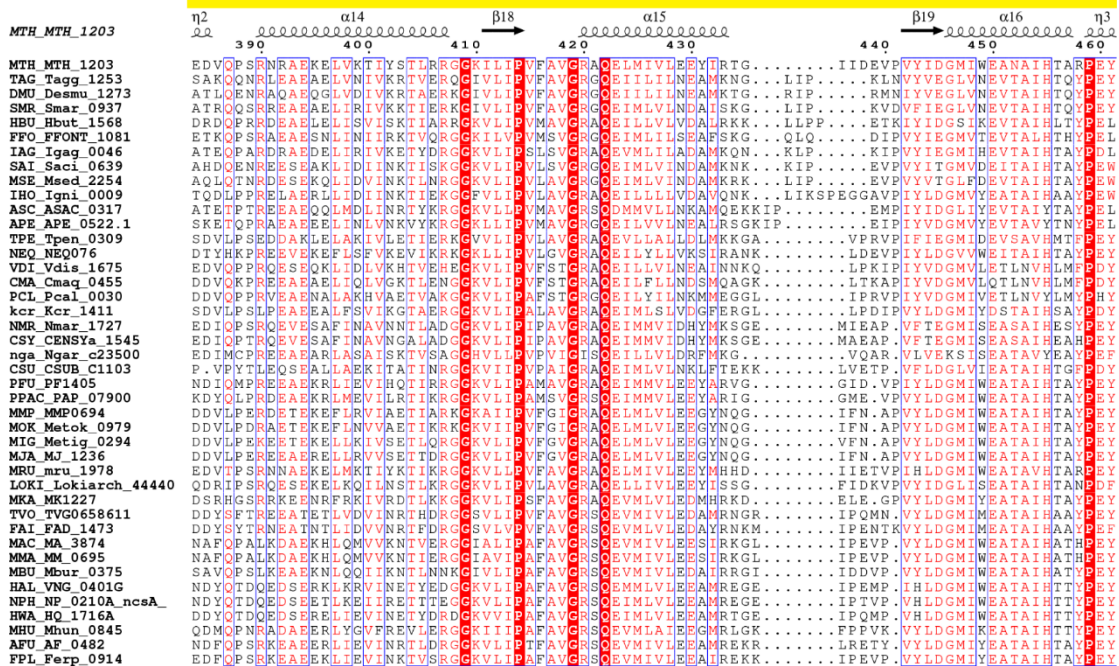



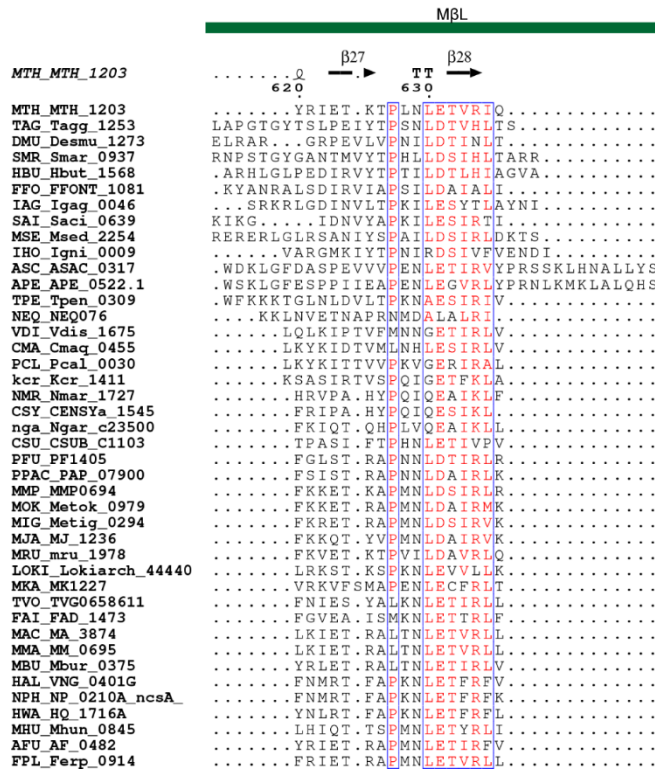

**Figure S1. Sequence alignment, secondary structure, and functional motifs of the aCPSF1 orthologs.** Sequences were aligned using ClustalW program (1) and the diagram was prepared using ESPript program (2). Identical residues are highlighted as white type on a red background and similar residues are shown as red type. Species: MTH, *Methanothermobacter thermautotrophicus*; TAG, *Thermosphaera aggregans*; DMU, *Desulfurococcus mucosus*; SMR, *Staphylothermus marinus*; HBU, *Hyperthermus butylicus*; FFO, *Fervidicoccus fontis*; IAG, *Ignisphaera aggregans*; SAI, *Sulfolobus acidocaldarius* DSM 639; MSE, *Metallosphaera sedula*; IHO, *Ignicoccus hospitalis*; ASC, *Acidilobus saccharovorans*; APE, *Aeropyrum pernix*; TPE, *Thermofilum pendens*; NEQ, *Nanoarchaeum equitans*; VDI, *Vulcanisaeta distributa*; CMA, *Caldivirga maquilingensis*; PCL, *Pyrobaculum calidifontis*; Kcr, *Ca. Korarchaeum cryptofilum*; NMR, *Nitrosopumilus maritimus*; CSY, *Cenarchaeum symbiosum*; nga, *Ca. Nitrososphaera gargensis*; CSU, *Ca. Caldiarchaeum*

*subterraneum*; PFU, *Pyrococcus furiosus* DSM 3638 ; PPAC, *Palaeococcus pacificus*;  
MMP, *Methanococcus maripaludis* S2; MOK, *Methanothermococcus okinawensis*;  
MIG, *Methanotorris igneus*; MJA, *Methanocaldococcus jannaschii*; MRU,  
*Methanobrevibacter ruminantium*; HAL, *Halobacterium salinarum* NRC-1; NPH,  
*Natronomonas pharaonis*; HWA, *Haloquadratum walsbyi* DSM 16790; MHU,  
*Methanospirillum hungatei*; AFU, *Archaeoglobus fulgidus* DSM 4304; FPL,  
*Ferroglobus placidus*. Secondary structural elements and the domains of the aCPSF1  
ortholog (MTH1203) from *M. thermotrophicus* are shown at the sequence top. The  
seven conserved motifs, Motifs I-IV and Motifs A-C, which are featured in the metallo-  
 $\beta$ -lactamase (M $\beta$ L) superfamily proteins are labeled beneath the consensus residues.

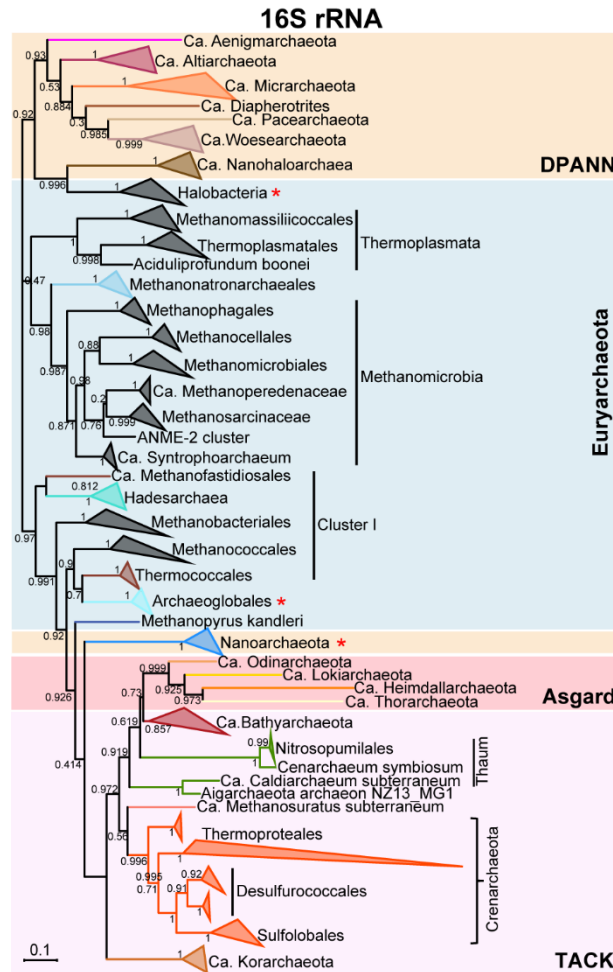

**Figure S2. The 16S rRNA phylogeny of archaea in comparison of the aCPSF1 phylogeny shown in Figure 3A.** 16S rRNA genes (>1200 bp) were retrieved from the same 143 representative archaeal genomes used in Figure 3A. Consensus 1200 bp-nucleotides of the 16S rRNA genes were used to construct a maximum likelihood phylogenetic trees using IQ-TREE (v.1.6.12) with “LG+I+G4” mode and 1000 times ultrafast. The phylogenetic tree was visualized with iTOL v5 (<https://itol.embl.de/>). Branch support values are indicated by percentages. Scale bar indicates the number of substitutions per site.



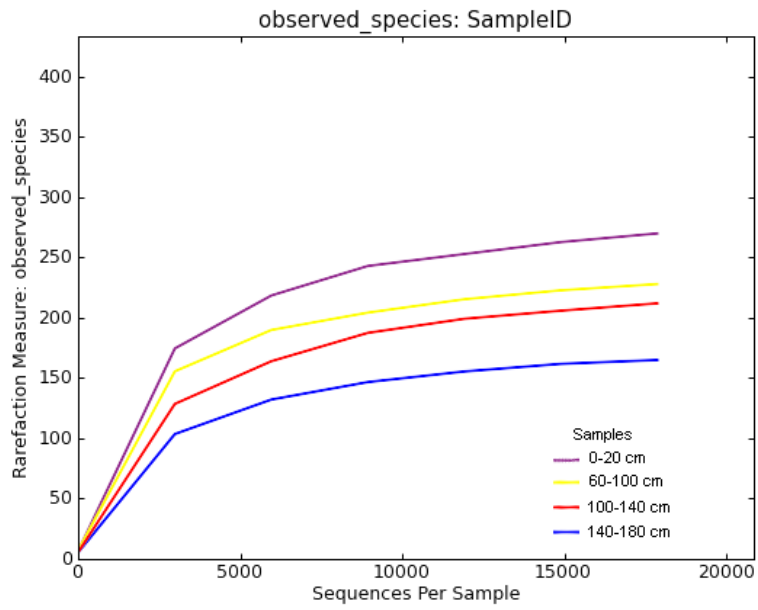

**Figure S3. Rarefaction curves of the archaeal OTUs against 16S rRNA sequence reads in the four cold seep samples from the South China Sea.** Duplicate 16S rRNA amplicon sequencings were performed for each sample and OTUs were clustered based on the threshold of 97% sequence similarity of 16S rRNA sequence.

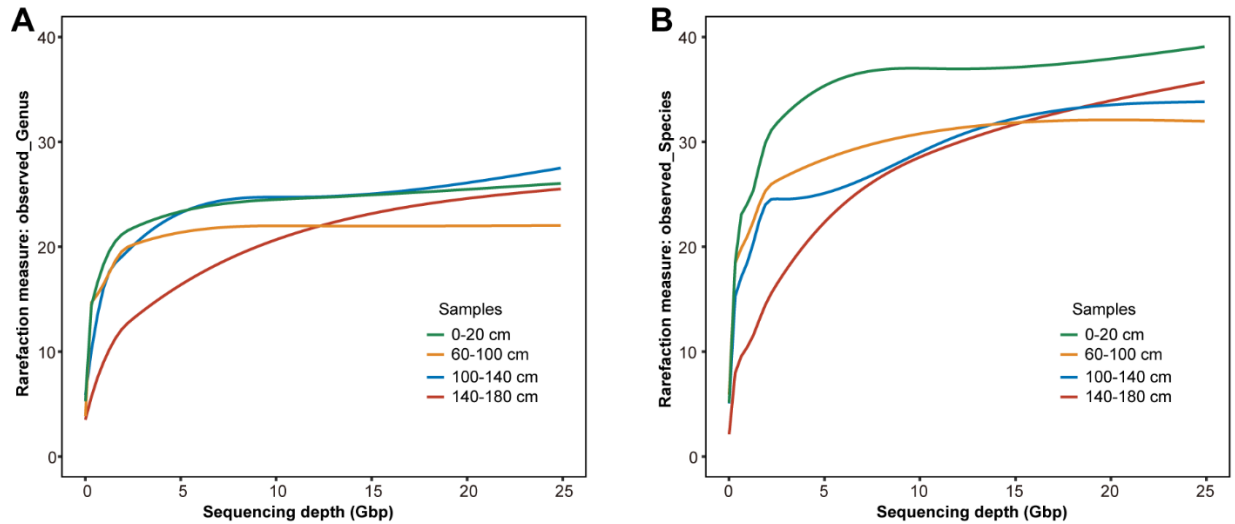

**Figure S4. Rarefaction curves of archaeal richness at genus (A) and species (B)**

**levels based on abundance of aCPSF1 genes in different sequencing depths.**

Rarefaction tool kit (RTK) (3) was used to rarefy a series of sequencing depths, *e.g.*, 5,

10 and 15Gb, and estimate the archaeal alpha-richness. aCPSF1 mapped reads were

retrieved from the metagenomic sequences of each sample and the archaeal richness

were merged based on the taxonomy of aCPSF1 genes listed in Supplementary Dataset

S1.

## SI References

1. Larkin MA, Blackshields G, Brown NP, Chenna R, McGettigan PA, McWilliam H, Valentin F, Wallace IM, Wilm A, Lopez R, Thompson JD, Gibson TJ, Higgins DG. 2007. Clustal W and Clustal X version 2.0. *Bioinformatics* 23:2947-8.
2. Gouet P, Courcelle E, Stuart DI, Metoz F. 1999. ESPript: analysis of multiple sequence alignments in PostScript. *Bioinformatics* 15:305-8.
3. Saary, P, Forslund, K, Bork, P and Hildebrand, F. 2017. RTK: efficient rarefaction analysis of large datasets. *Bioinformatics* 33(16): 2594-2595
